# Supplementary material
Source: PubMed Central journal article supplement (PMC8284916)
Supplement: NIHMS1714735-supplement-supinfo.pdf [file NIHMS1714735-supplement-supinfo.pdf]

## Data Source Details

The data source for the study was the Sentinel distributed network which uses electronic health record and insurance claims. Data on demographics, diagnosis, and treatment are available and have been standardized and curated. Each of the participating research partners maintains a local version of its own data in a Common Data Model format in order to enable distributed queries. To ensure privacy and data protection, queries are distributed and results are returned through a secure portal. The current study leveraged electronic health data in the Sentinel distributed network locally transformed to a Common Data Model from the following 2 participating research partners: Anthem/Healthcore and Humana Healthcare Research Inc. (HHR)/ Humana HealthCare Research is a wholly owned subsidiary of Humana Inc. staffed with a research team to conduct patient-centered research engaging in publicly and privately funded research grants and contracts. More details are available from the following references

1. Robb MA, Racoosin JA, Sherman RE, Gross TP, Ball R, Reichman ME, et al. The US Food and Drug Administration's Sentinel Initiative: expanding the horizons of medical product safety. *Pharmacoepidemiol Drug Saf.* 2012;21 Suppl 1:9-11.
2. Platt R, Brown JS, Robb M, et al. The FDA Sentinel Initiative - An Evolving National Resource. *N Engl J Med.* 2018;379(22):2091-2093.
3. Behrman RE, Benner JS, Brown JS, McClellan M, Woodcock J, Platt R. Developing the Sentinel System--a national resource for evidence development. *N Engl J Med.* 2011;364(6):498-499.

**Supplementary Table 1. Names of drugs used to identify Alzheimer's disease participants and antidopaminergic-antiparkinsonian prescribing cascade**

| <b><u>Alzheimer's Disease Drugs</u></b> | <b><u>Antipsychotics and Metoclopramide</u></b> | <b><u>Anti-Parkinsonian Agents</u></b>          |
|-----------------------------------------|-------------------------------------------------|-------------------------------------------------|
| Donepezil HCL                           | <b>Typical antipsychotics</b>                   | <b>Dopamine precursors</b>                      |
| Galantamine HBR                         | Promazine                                       | Levodopa-Carbidopa                              |
| Memantine HCL/ Donepezil HCL            | Chlorpromazine                                  | <b>Dopamine agonists</b>                        |
| Memantine HCL                           | Haloperidol                                     | Apomorphine                                     |
| Rivastigmine                            | Loxapine                                        | Bromocriptine                                   |
|                                         | Thioridazine                                    | Pramipexole                                     |
|                                         | Molindone                                       | Rotigotine                                      |
|                                         | Thiothixene                                     | Ropinirole                                      |
|                                         | Fluphenazine                                    |                                                 |
|                                         | Mesoridazone                                    | <b>Mono-Amine Oxidase-B Inhibitors</b>          |
|                                         | Trifluoperazine                                 | Selegeline                                      |
|                                         | Pimozide                                        | Rasagiline                                      |
|                                         | Perphenazine                                    | Safinamide                                      |
|                                         | Flupenthixol                                    | <b>Catechol-o-methyl transferase inhibitors</b> |
|                                         | Prochlorperazine                                | Entacapone                                      |
|                                         | Sulpiride                                       | Tolcapone                                       |
|                                         | Prochlorperazine                                | Antiviral                                       |
|                                         |                                                 | Amantadine                                      |
|                                         | <b>Atypical antipsychotics</b>                  | Anticholinergics                                |
|                                         | Clozapine                                       | Trihexyphenidyl                                 |
|                                         | Olanzapine                                      | Benzotropine                                    |
|                                         | Quetiapine                                      | Ethopropazine                                   |
|                                         | Brexpiprazole                                   |                                                 |
|                                         | Aripiprazole                                    |                                                 |
|                                         | Ziprasidone                                     |                                                 |
|                                         | Risperidone                                     |                                                 |
|                                         | Asenapine                                       |                                                 |
|                                         | Iloperidone                                     |                                                 |
|                                         | Paliperidone                                    |                                                 |
|                                         | Lurasidone                                      |                                                 |
|                                         | Olanzapine/Fluoxetine                           |                                                 |
|                                         |                                                 |                                                 |
|                                         |                                                 |                                                 |
|                                         | <b>Metoclopramide</b>                           |                                                 |

| <b>Supplementary Table 2. List of Antipsychotics/Metoclopramide evaluated in the study</b> |                 |                   |
|--------------------------------------------------------------------------------------------|-----------------|-------------------|
| <b>Drugs</b>                                                                               | <b>N (4534)</b> | <b>Percentage</b> |
| <b>Antipsychotics</b>                                                                      |                 |                   |
| Aripiprazole                                                                               | 147             | 3.24              |
| Asenapine maleate                                                                          | 5               | 0.11              |
| Brexpiprazole                                                                              | 6               | 0.13              |
| Chlorpromazine HCl                                                                         | 25              | 0.55              |
| Clozapine                                                                                  | 6               | 0.13              |
| Fluphenazine HCl                                                                           | 6               | 0.13              |
| Haloperidol                                                                                | 343             | 7.57              |
| Haloperidol decanoate                                                                      | 2               | 0.04              |
| Haloperidol lactate                                                                        | 86              | 1.9               |
| Loxapine succinate                                                                         | 5               | 0.11              |
| Lurasidone HCl                                                                             | 10              | 0.22              |
| Olanzapine                                                                                 | 330             | 7.28              |
| Olanzapine/fluoxetine HCl                                                                  | 5               | 0.11              |
| Paliperidone                                                                               | 6               | 0.13              |
| Paliperidone palmitate                                                                     | 6               | 0.13              |
| Perphenazine                                                                               | 12              | 0.26              |
| Pimozide                                                                                   | 6               | 0.13              |
| Prochlorperazine                                                                           | 17              | 0.37              |
| Prochlorperazine edisylate                                                                 | 6               | 0.13              |
| Prochlorperazine maleate                                                                   | 177             | 3.9               |
| Quetiapine fumarate                                                                        | 2,238           | 49.36             |
| Risperidone                                                                                | 825             | 18.2              |
| Risperidone microspheres                                                                   | 5               | 0.11              |
| Thioridazine HCl                                                                           | 7               | 0.15              |
| Thiothixene                                                                                | 1               | 0.02              |
| Trifluoperazine HCl                                                                        | 3               | 0.07              |
| Ziprasidone HCl                                                                            | 32              | 0.71              |
| Ziprasidone mesylate                                                                       | 9               | 0.2               |
|                                                                                            |                 |                   |
| <b>Metoclopramide HCl</b>                                                                  | <b>307</b>      | <b>6.77</b>       |

**Supplementary Table 3. Disenrollment of Alzheimer’s disease participants.**

| <b>Cohort</b>              | <b>Cohort name</b>                                                               | <b>Denominator</b> | <b>Numerator</b> | <b>Censoring, data partner maximum</b> | <b>Censoring, disenrollment</b> | <b>Censoring, death</b> | <b>Censoring, Episode end antipsychotic/ metoclopramide</b> | <b>Censoring, Episode end antiparkinsonian</b> |
|----------------------------|----------------------------------------------------------------------------------|--------------------|------------------|----------------------------------------|---------------------------------|-------------------------|-------------------------------------------------------------|------------------------------------------------|
| <b>Alzheimer’s Disease</b> |                                                                                  | 6253579            | 121538           | 74867                                  | 27715                           | 18956                   | NA                                                          | NA                                             |
| <b>Cohort 1</b>            | Incident antipsychotic/metoclopramide use                                        | 121538             | 4534             | 303                                    | 428                             | 394                     | 3409                                                        | NA                                             |
|                            | Incident antipsychotic/metoclopramide use with incident antiparkinsonian use     | 4534               | 36               | 3                                      | 6                               | 2                       | 0                                                           | 25                                             |
| <b>Cohort 2</b>            | Polypharmacy                                                                     | 121538             | 3485             | 1601                                   | 1037                            | 847                     | NA                                                          | NA                                             |
|                            | Prescribing cascades among those with polypharmacy in Alzheimer’s Disease cohort | 3485               | 20               | 2                                      | 4                               | 1                       | 0                                                           | 15                                             |

NA= Not applicable

# Supplementary Figure 1. Prescribing cascades among those with polypharmacy in Alzheimer's Disease cohort

Polypharmacy at dispensing of antipsychotic/metoclopramide\*\*

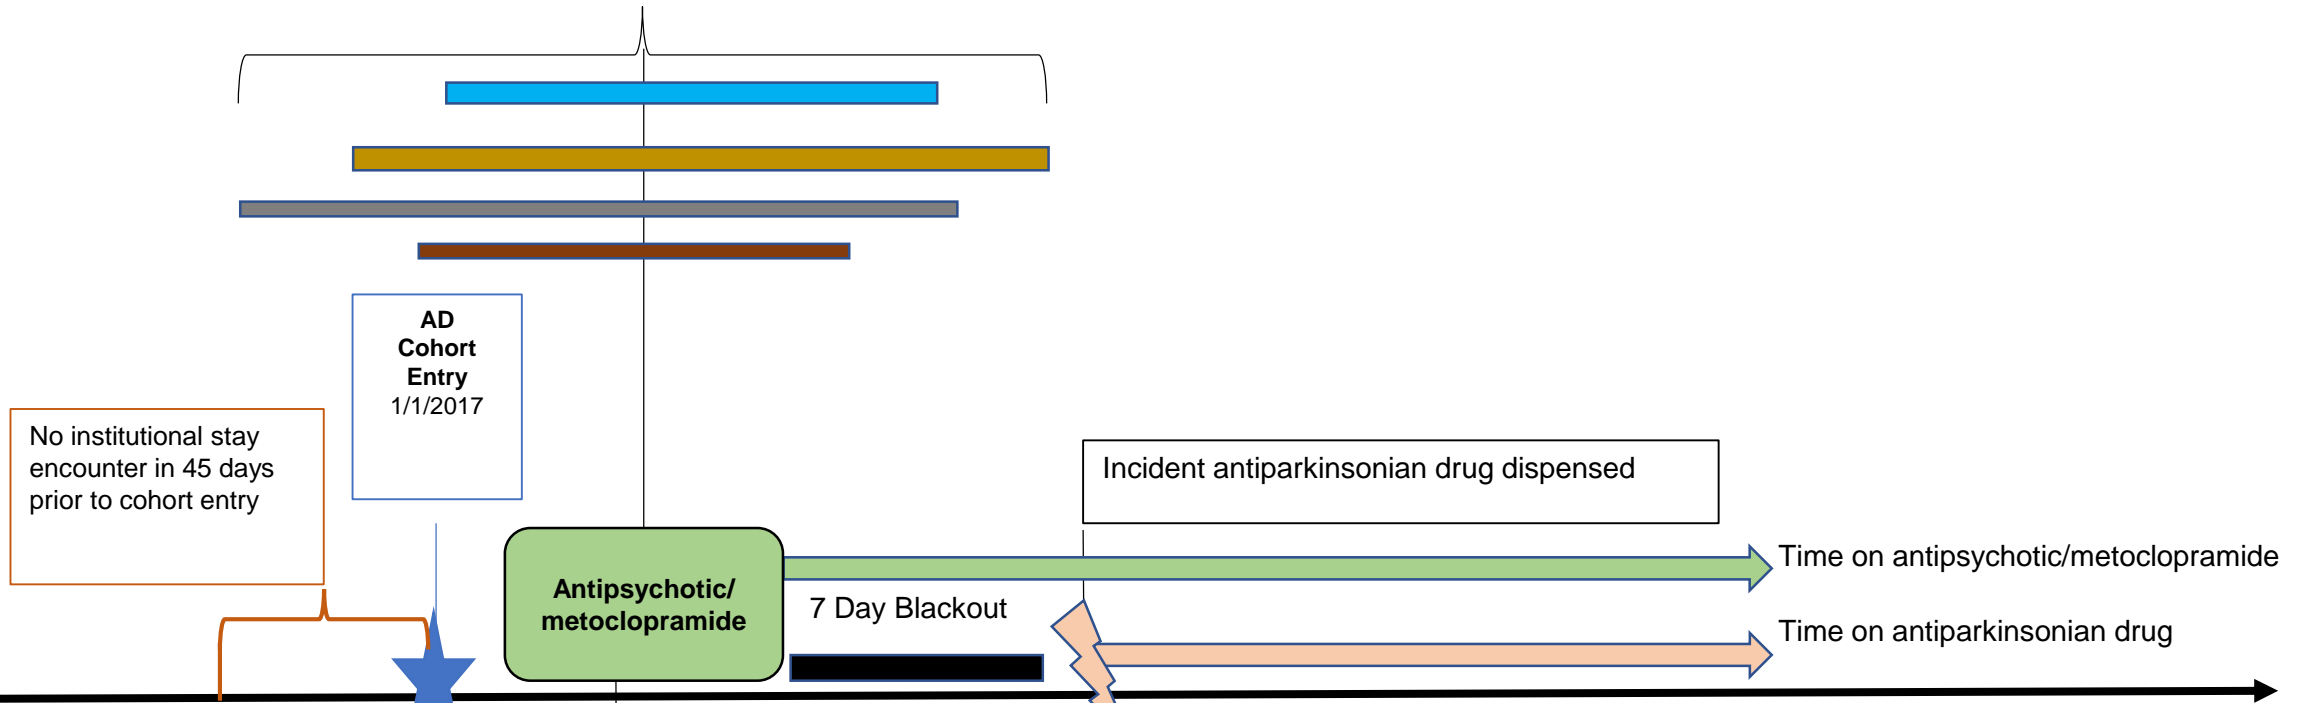

No institutional stay encounter in 45 days prior to cohort entry

AD Cohort Entry  
1/1/2017

Incident antiparkinsonian drug dispensed

Antipsychotic/  
metoclopramide

7 Day Blackout

Time on antipsychotic/metoclopramide

Time on antiparkinsonian drug

Incident antipsychotic/metoclopramide dispensed

- 1. ADRD treatment for  $\geq 1$  day 365 days prior to cohort entry\*
- 2. Continuous medical and pharmacy coverage in 365 days prior to cohort entry

- Censor when:
- Disenrolled from medical or pharmacy coverage
  - Death
  - Data partner end date

AD treatments include Donepezil, Galantamine, memantine and others  
Antipsychotics include Quetiapine, Haloperidol, aripiprazole and others.  
Antiparkinsonian drugs include Levodopa-carbidopa, selegiline, amantadine and others.
